# Supplementary material for: Exploring the administrative burden faced by hematologists: a comprehensive study in Italy
Source: PubMed Central journal article supplement — Glob Reg Health Technol Assess. 2024 Jul 3;11:161–8. doi: 10.33393/grhta.2024.3042 (PMC11228512; doi:10.33393/grhta.2024.3042), 2024-07-03
Supplement: grhta-11-161_Supplementary_material.pdf [file grhta-11-161_Supplementary_material.pdf]

APPENDIX

Table 1 – Demographic and professional characteristics

| Categories                                           | No. (%) of total sample |
|------------------------------------------------------|-------------------------|
| <b>TOTAL</b>                                         | <b>174</b>              |
| <b>Gender</b>                                        |                         |
| Male                                                 | 66 (37.93%)             |
| Female                                               | 108 (62.07%)            |
| <b>Age</b>                                           |                         |
| < 35                                                 | 47 (27.01%)             |
| 36-45                                                | 51 (29.31%)             |
| 46-55                                                | 35 (20.12%)             |
| 56-65                                                | 34 (19.54%)             |
| > 66                                                 | 7 (4.02%)               |
| <b>Province</b>                                      |                         |
| Lombardia                                            | 38 (21.84%)             |
| Lazio                                                | 26 (14.94%)             |
| Toscana                                              | 22 (12.65%)             |
| Veneto                                               | 16 (9.20%)              |
| Emilia-Romagna                                       | 16 (9.20%)              |
| Piemonte                                             | 15 (8.62%)              |
| Puglia                                               | 11 (6.32%)              |
| Campania                                             | 6 (3.45%)               |
| Sicilia                                              | 6 (3.45%)               |
| Umbria                                               | 5 (2.88%)               |
| Abruzzo                                              | 3 (1.72%)               |
| Sardegna                                             | 3 (1.72%)               |
| Liguria                                              | 2 (1.15%)               |
| Friuli-Venezia Giulia                                | 2 (1.15%)               |
| Basilicata                                           | 1 (0.57%)               |
| Marche                                               | 1 (0.57%)               |
| Calabria                                             | 1 (0.57%)               |
| <b>Experience (haemato-oncology)</b>                 |                         |
| > 5                                                  | 24 (13.80%)             |
| 5-14                                                 | 54 (31.03%)             |
| 15-24                                                | 45 (25.86%)             |
| 25-35                                                | 38 (21.84%)             |
| > 30                                                 | 13 (7.47%)              |
| <b>Number of patients seen during a typical week</b> |                         |
| 5-24                                                 | 19 (10.92%)             |
| 25-44                                                | 33 (18.96%)             |
| 45-64                                                | 57 (32.76%)             |
| 65-84                                                | 25 (14.37%)             |
| 85-105                                               | 31 (17.82%)             |
| > 105                                                | 9 (5.17%)               |
| <b>Hematological malignancies currently treating</b> |                         |

|                                                                                                                         |              |
|-------------------------------------------------------------------------------------------------------------------------|--------------|
| Leukemia                                                                                                                | 113 (64.94%) |
| Lymphoma                                                                                                                | 103 (59.19%) |
| Myeloma                                                                                                                 | 72 (41.38%)  |
| Other hematologic malignancies                                                                                          | 45 (25.86%)  |
| <b>Employed by national health care service (NHS) or private sector</b>                                                 |              |
| NHS (civil servant)                                                                                                     | 142 (81.61%) |
| Private sector                                                                                                          | 32 (18.39%)  |
| <b>Type of facility</b>                                                                                                 |              |
| Public hospital integrated with the University                                                                          | 74 (42.53%)  |
| Public hospital integrated with NHS                                                                                     | 59 (33.90%)  |
| Public IRCCS (Scientific Institute for Research, Hospitalization and Healthcare)                                        | 24 (13.79%)  |
| Private IRCCS (Scientific Institute for Research, Hospitalization and Healthcare)                                       | 8 (4.60%)    |
| Private university policlinic                                                                                           | 5 (2.87%)    |
| Accredited private institute under local health authorities                                                             | 3 (1.72%)    |
| Private IRCCS (Scientific Institute for Research, Hospitalization and Healthcare) integrated with university policlinic | 1 (0.57%)    |
| <b>Entering clinical data into registers or electronic records</b>                                                      |              |
| Yes                                                                                                                     | 158 (90.80%) |
| No                                                                                                                      | 16 (9.20%)   |
